# Supplementary material for: Curcumin and Quercetin-Loaded Lipid Nanocarriers: Development of Omega-3 Mucoadhesive Nanoemulsions for Intranasal Administration
Source: MDPI journal article supplement (doi:10.3390/nano12071073), 2022-03-25
Supplement: s1 [file s1]

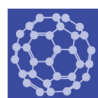

# Curcumin and Quercetin-Loaded Lipid Nanocarriers: Development of Omega-3 Mucoadhesive Nanoemulsions for Intranasal Administration

Gustavo Richter Vaz <sup>1</sup>, Mariana Corrêa Falkembach Carrasco <sup>1</sup>, Matheus Monteiro Batista <sup>1</sup>, Paula Alice Bezerra Barros <sup>1</sup>, Meliza da Conceição Oliveira <sup>1</sup>, Ana Luiza Muccillo-Baisch <sup>1</sup>, Virginia Campello Yurgel <sup>1</sup>, Francesca Buttini <sup>2</sup>, Félix Alexandre Antunes Soares <sup>3</sup>, Larissa Marafiga Cordeiro <sup>3</sup>, Flavia Fachel <sup>4</sup>, Helder Ferreira Teixeira <sup>4</sup>, Juliana Bidone <sup>5</sup>, Patrícia Diaz de Oliveira <sup>6</sup>, Fabio Sonvico <sup>2</sup> and Cristiana Lima Dora <sup>1,\*</sup>

Table S1. Ex vivo Permeation release of QU and CUR.

| Formulation | Time (Hours) | Ex Vivo Permeation Release of QU (%) | Ex Vivo Permeation Release of CUR (%) |
|-------------|--------------|--------------------------------------|---------------------------------------|
| CQ NEdif-   | 0.5          | 0.00 ± 0.00                          | 0.00 ± 0.00                           |
|             | 2.0          | 0.00 ± 0.00                          | 8.28 ± 0.98                           |
|             | 4.0          | 1.12 ± 0.04                          | 6.32 ± 1.11                           |
|             | 8.0          | 2.29 ± 0.87                          | 7.91 ± 2.08                           |
|             | 10.0         | 2.23 ± 0.73                          | 7.59 ± 1.45                           |
|             | 12.0         | 2.18 ± 0.40                          | 6.91 ± 0.96                           |
| CQ NE-      | 0.5          | 0.00 ± 0.00                          | 0.00 ± 0.00                           |
|             | 2.0          | 0.00 ± 0.00                          | 0.00 ± 0.00                           |
|             | 4.0          | 0.21 ± 0.18                          | 0.72 ± 0.63                           |
|             | 8.0          | 0.60 ± 0.52                          | 1.70 ± 0.10                           |
|             | 10.0         | 0.65 ± 0.57                          | 2.42 ± 0.02                           |
|             | 12.0         | 0.66 ± 0.52                          | 2.36 ± 0.39                           |
